# Supplementary material for: Crack control in dried ferro-colloidal droplets: effect of particle aspect-ratio and magnetic field orientations
Source: Royal Society of Chemistry journal article supplement (doi:10.1039/d4cp04667f), 2025-01-01
Supplement: d4cp04667f1.pdf [file d4cp04667f1.pdf]

**Supporting Information**

**Crack control in dried ferro-colloidal droplets:  
Effect of particle aspect-ratio and magnetic field  
orientations**

1

Deeksha Rani\* and Subhendu Sarkar\*

*Surface Modifications and Applications Laboratory (SMAL), Department of Physics, Indian  
Institute of Technology Ropar, Rupnagar, Punjab, 140001 India*

E-mail: deeksha.19phz0012@iitrpr.ac.in; sarkar@iitrpr.ac.in

2 Desiccation patterns of ferro-colloidal in the absence of  
3 magnetic field

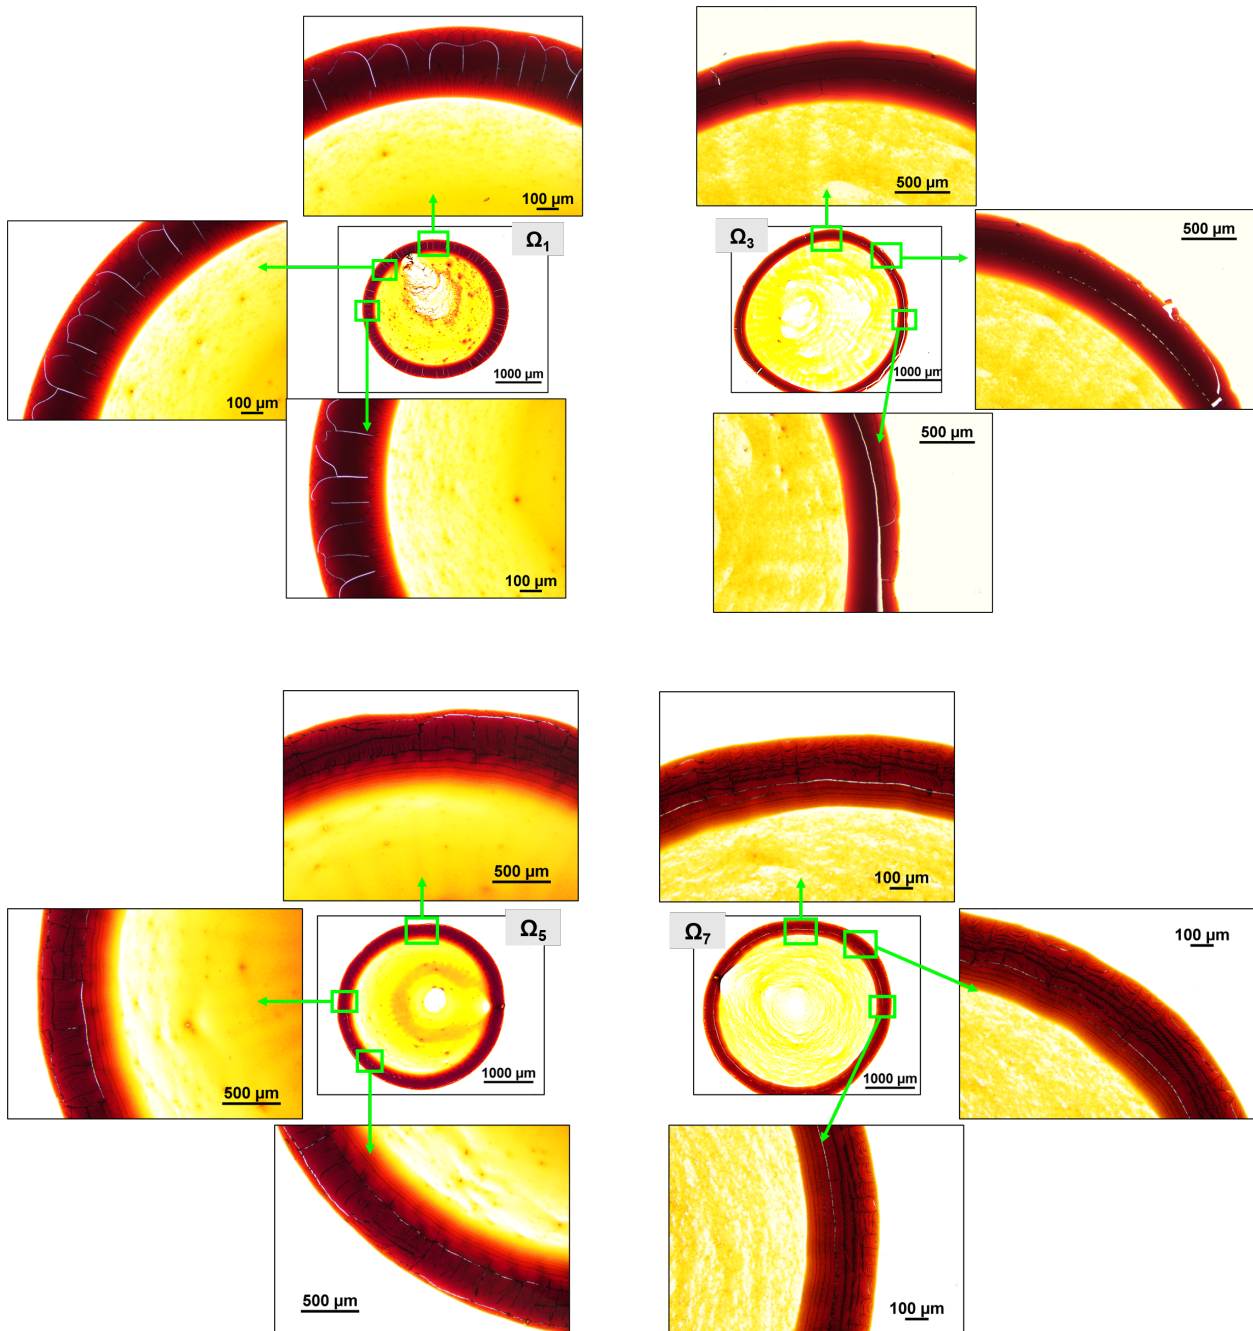

Figure S1: Optical images of the deposits of various aspect ratios of dried ferro-colloidal droplet without external field

4 Desiccation patterns of ferro-colloidal in the parallel di-  
5 rection of magnetic field

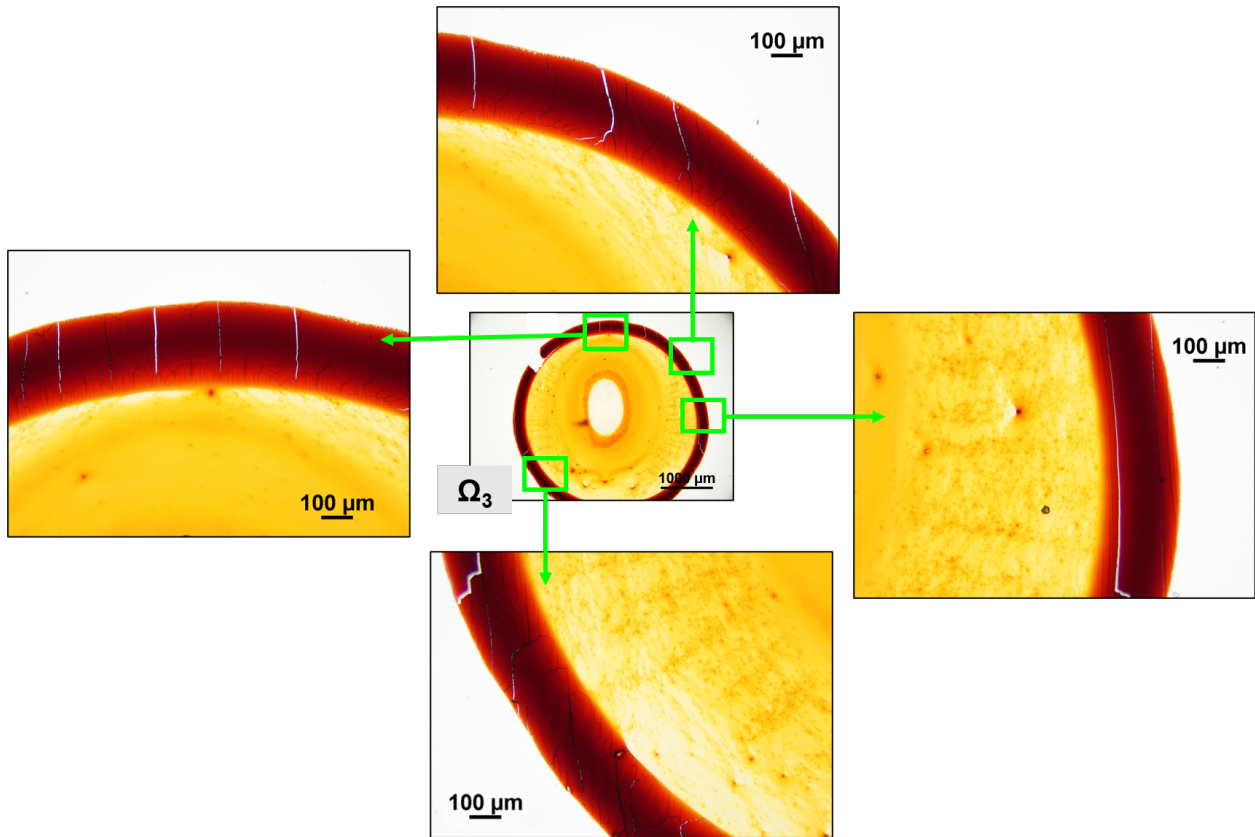

Figure S2: Optical images of the deposits of  $\Omega_3$  colloidal droplet in parallel orientation external field

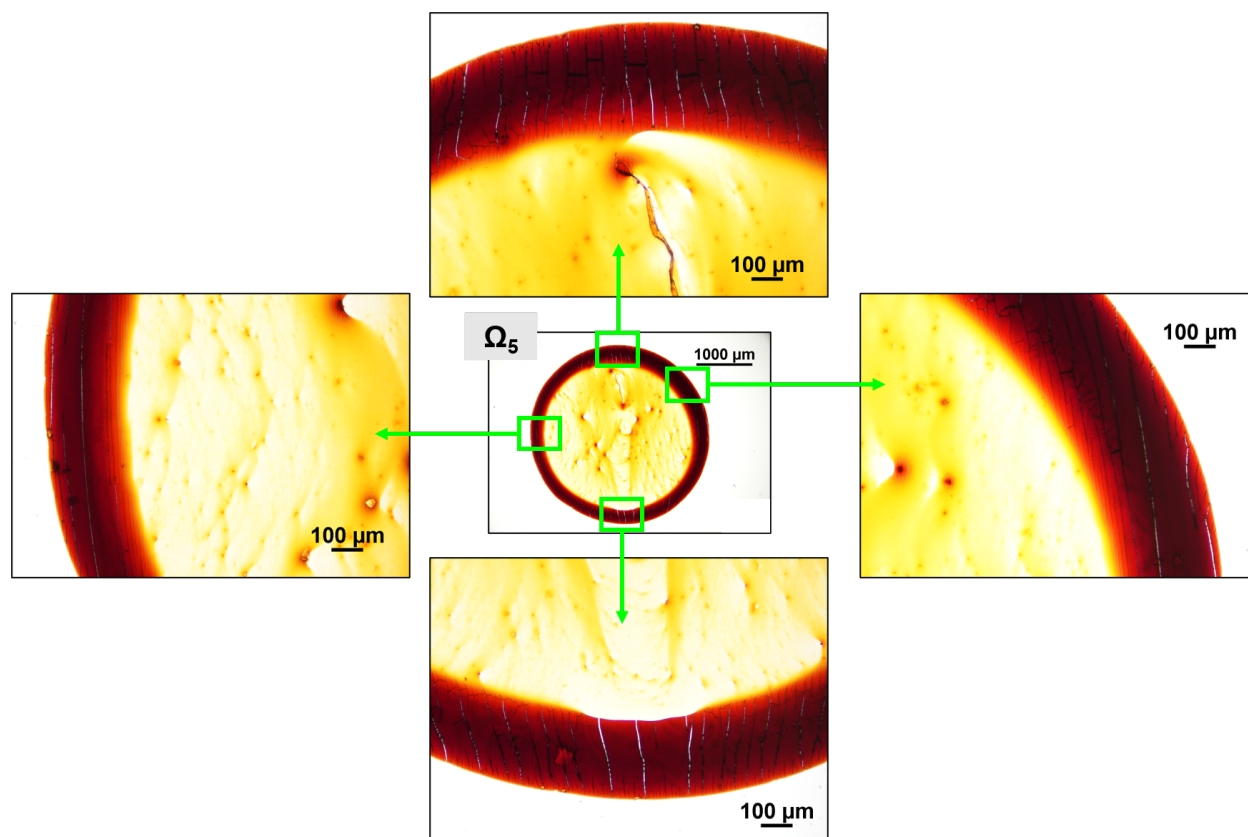

Figure S3: Optical images of the deposits of  $\Omega_5$  colloidal droplet in parallel orientation external field

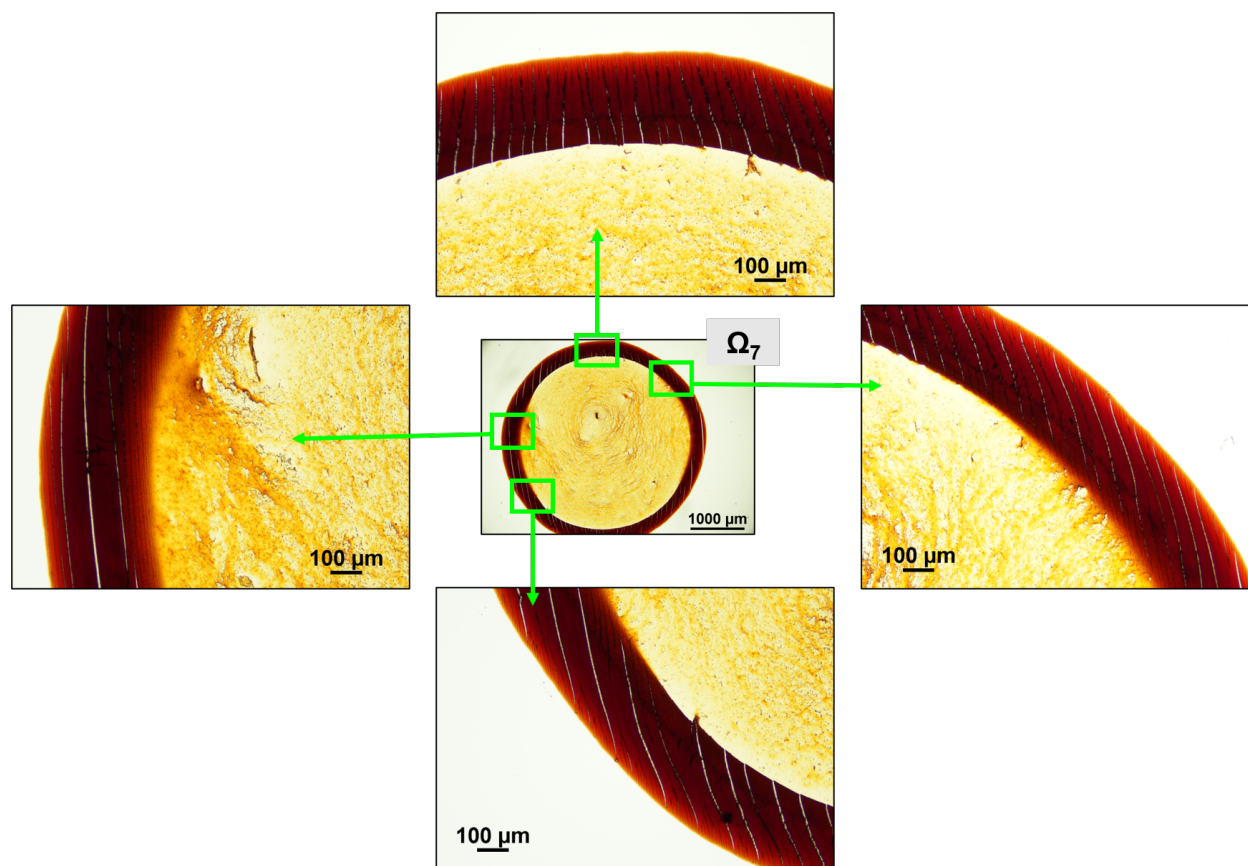

Figure S4: Optical images of the deposits of  $\Omega_7$  colloidal droplet in parallel orientation external field

6 Desiccation patterns of ferro-colloidal in the perpendicular  
7 ular direction of magnetic field

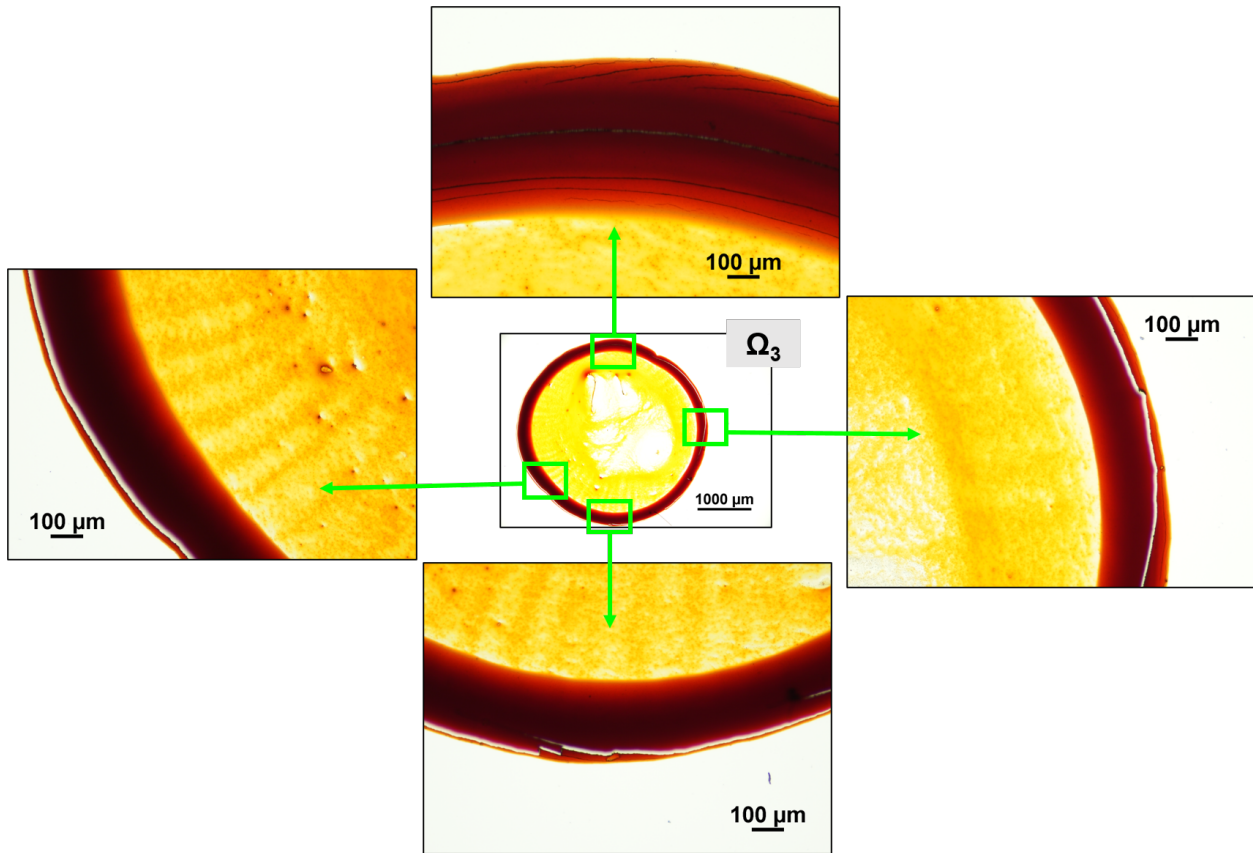

Figure S5: Optical images of the deposits of  $\Omega_3$  colloidal droplet in perpendicular orientation external field

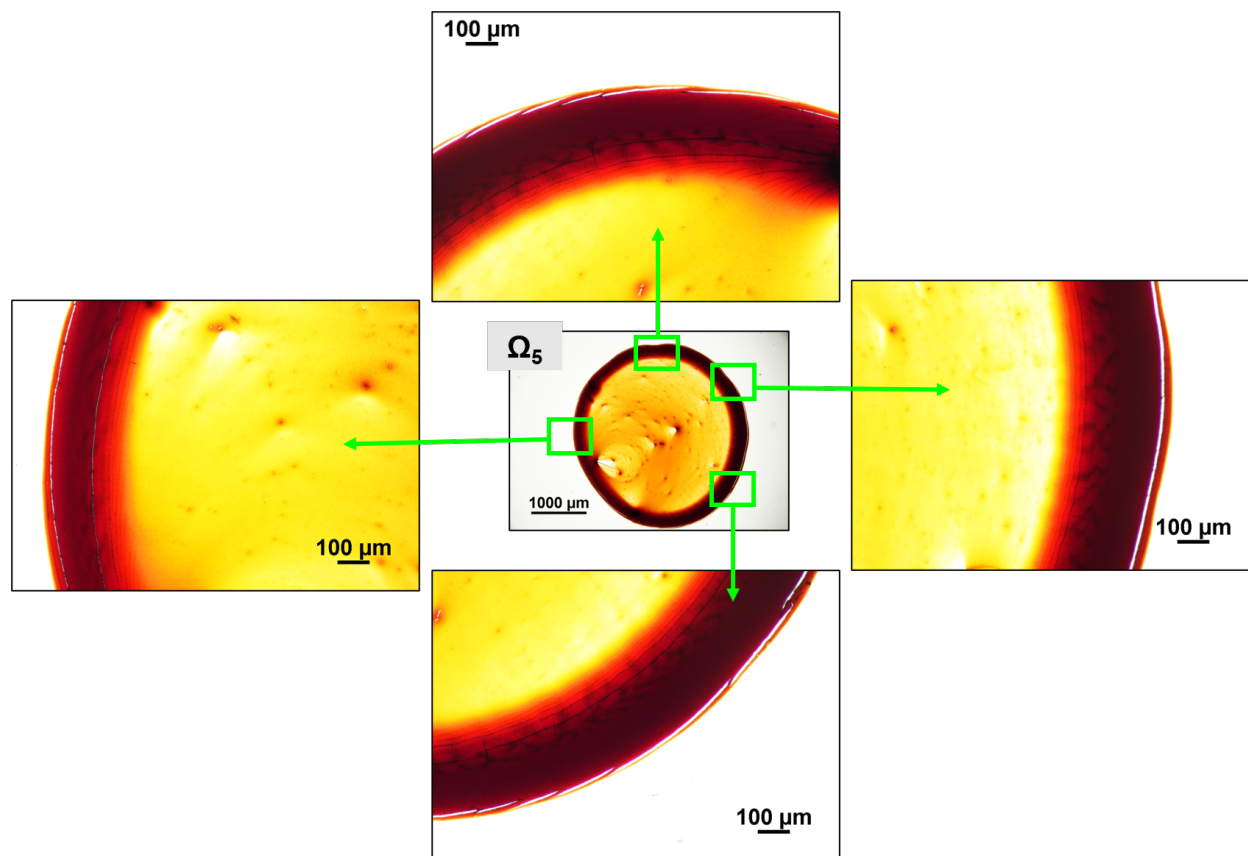

Figure S6: Optical images of the deposits of  $\Omega_5$  colloidal droplet in perpendicular orientation external field

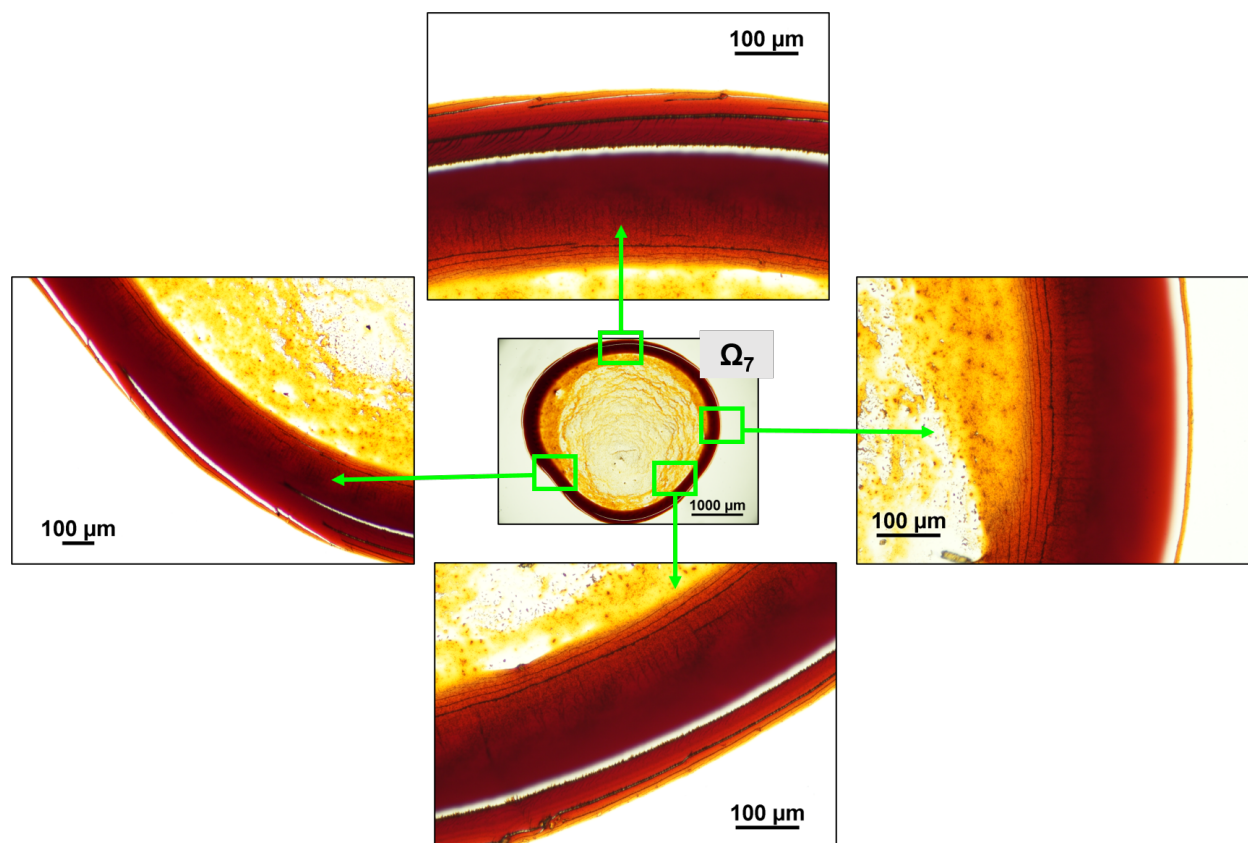

Figure S7: Optical images of the deposits of  $\Omega_7$  colloidal droplet in perpendicular orientation external field



8 Desiccation patterns of ferro-colloidal in the canted di-  
9 rection of magnetic field

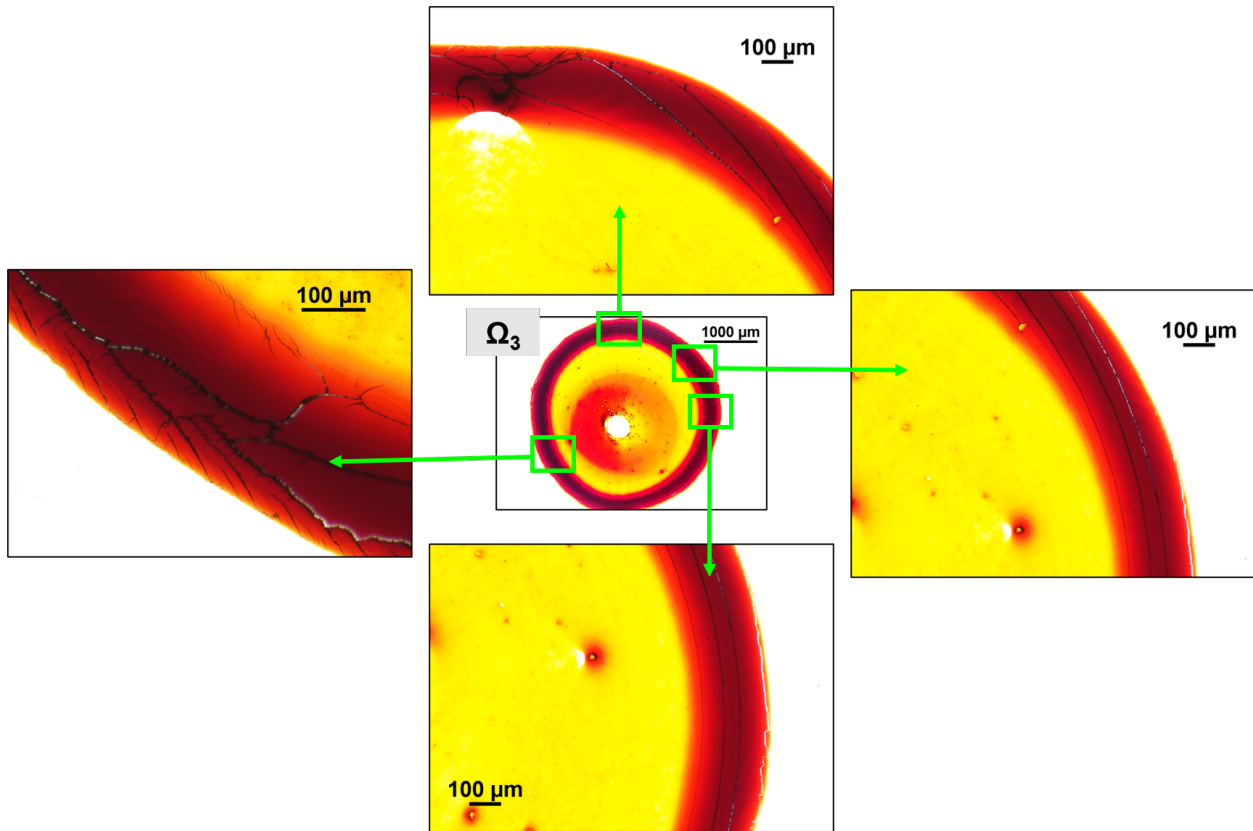

Figure S8: Optical images of the deposits of  $\Omega_3$  colloidal droplet in canted orientation external field

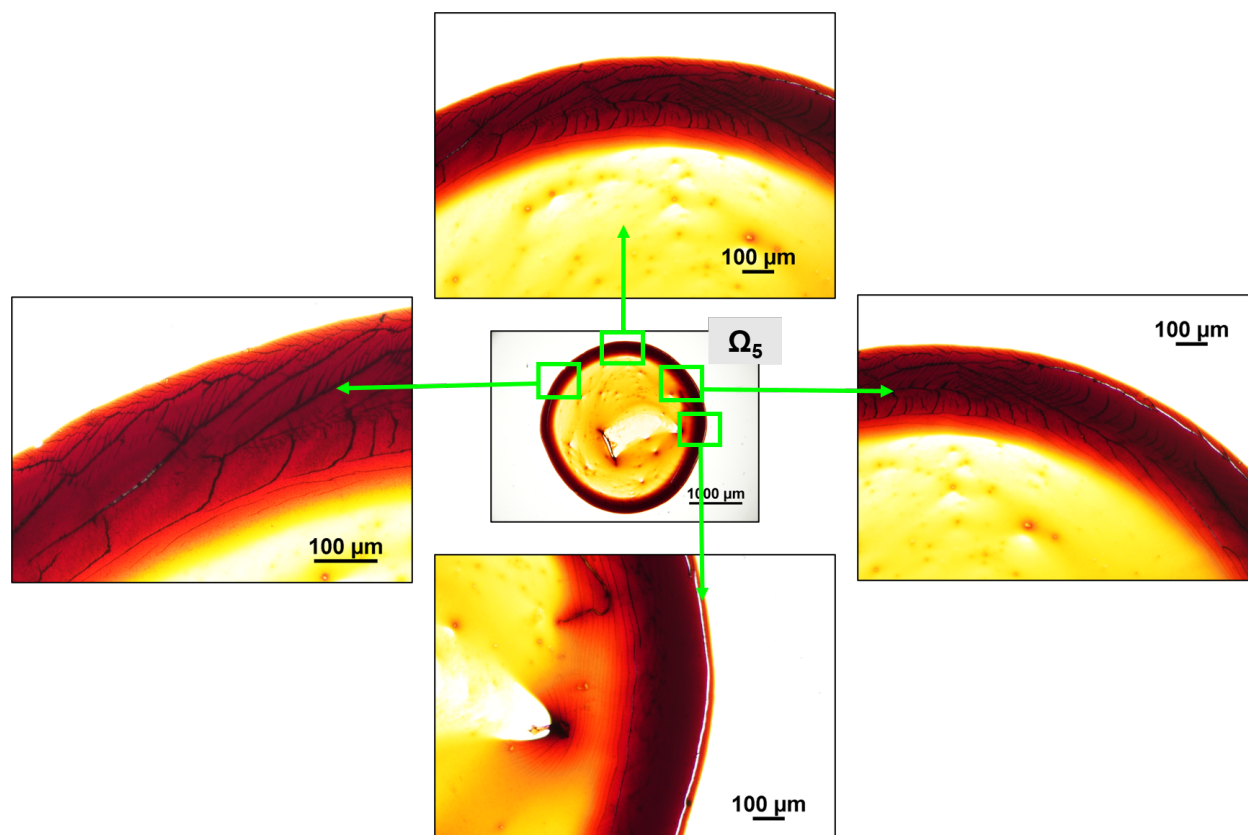

Figure S9: Optical images of the deposits of  $\Omega_5$  colloidal droplet in canted orientation external field

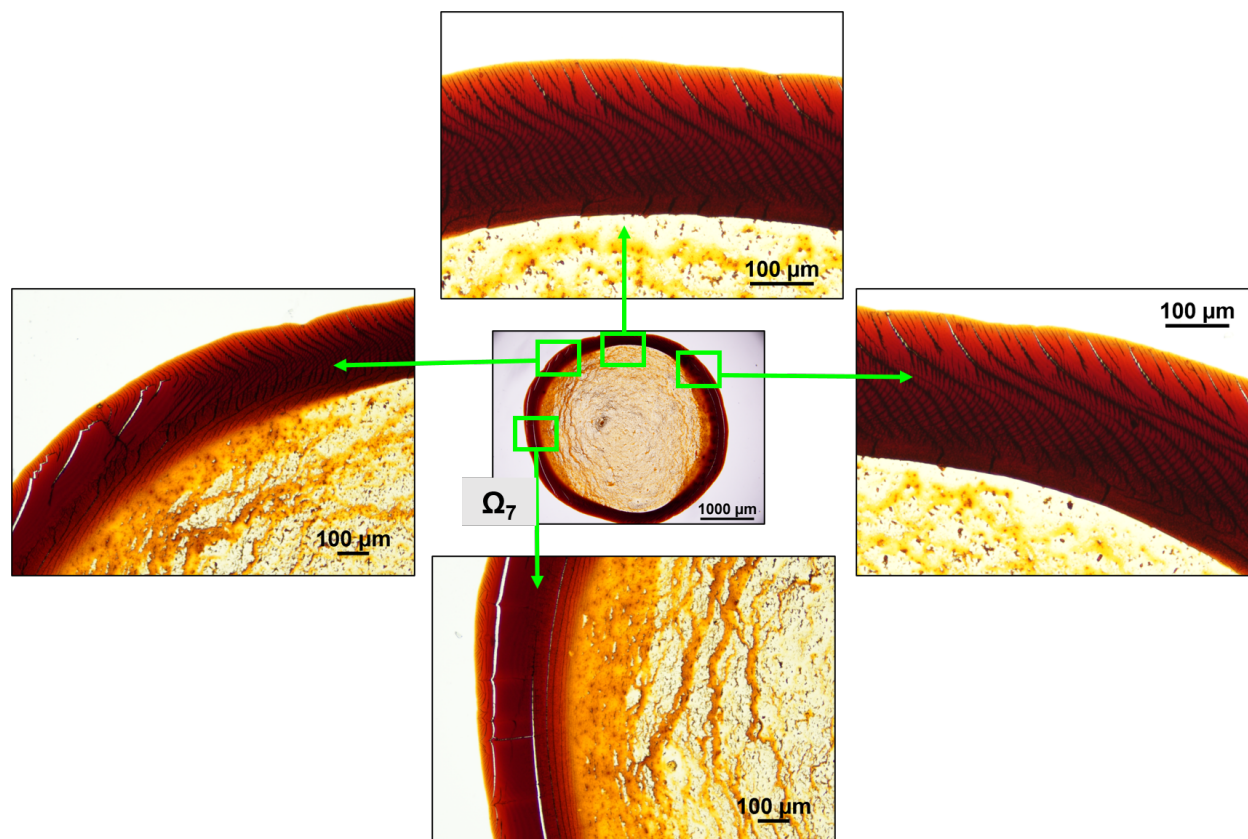

Figure S10: Optical images of the deposits of  $\Omega_7$  colloidal droplet in canted orientation external field
